# Supplementary material for: Methylselenol release as a cytotoxic tool: a study of the mechanism of the activity achieved by two series of methylselenocarbamate derivatives
Source: Royal Society of Chemistry journal article supplement (doi:10.1039/c8mt00140e), 2018-01-01
Supplement: c8mt00140e1.pdf [file c8mt00140e1.pdf]

**Table 1:** 2D dreiding descriptors for aliphatic derivatives<sup>a</sup>



| Re<br>f | Z                                                                   | JX         | JY         | Wiene<br>r | Zagre<br>b | CHI <sub>1</sub> | CHI <sub>2</sub> | CHI <sub>V1</sub> | CHI <sub>V2</sub> | CHI <sub>V3</sub><br>P | BIC        | E.ADJ.eq<br>u | E.ADJ.ma<br>g | E.DIST.eq<br>u |
|---------|---------------------------------------------------------------------|------------|------------|------------|------------|------------------|------------------|-------------------|-------------------|------------------------|------------|---------------|---------------|----------------|
| 1       | CH <sub>3</sub> CH <sub>2</sub>                                     | 4.113<br>5 | 4.483<br>6 | 428        | 60         | 7.1338           | 5.5334           | 6.8845            | 3.7308            | 2.241<br>2             | 0.780<br>4 | 125.845       | 160.000       | 594.342        |
| 2       | CH <sub>3</sub> (CH <sub>2</sub> ) <sub>2</sub>                     | 4.064<br>4 | 4.399<br>9 | 630        | 68         | 8.1337           | 6.2405           | 7.8845            | 4.5617            | 2.564<br>9             | 0.785<br>6 | 149.984       | 186.117       | 837.994        |
| 3       | CH <sub>3</sub> (CH <sub>2</sub> ) <sub>3</sub>                     | 4.001<br>6 | 4.305<br>4 | 892        | 76         | 9.1337           | 6.9476           | 8.9373            | 5.3713            | 3.266<br>6             | 0.742<br>4 | 174.706       | 212.877       | 1129.760       |
| 4       | CH <sub>3</sub> (CH <sub>2</sub> ) <sub>5</sub>                     | 3.727<br>8 | 3.968<br>1 | 1628       | 92         | 11.133<br>7      | 8.3618           | 10.884<br>5       | 6.6830            | 4.152<br>5             | 0.648<br>7 | 225.723       | 268.078       | 1861.630       |
| 5       | (CH <sub>3</sub> ) <sub>2</sub> CHCH<br>2                           | 4.157<br>5 | 4.470<br>7 | 860        | 80         | 8.8454           | 7.8984           | 8.6489            | 6.3770            | 2.900<br>1             | 0.775<br>4 | 185.697       | 240.215       | 1097.400       |
| 6       | CH <sub>2</sub> =CH-<br>CH <sub>2</sub>                             | 4.153<br>1 | 4.495<br>1 | 630        | 68         | 8.1337           | 6.2405           | 7.1560            | 4.1667            | 2.469<br>1             | 0.796<br>7 | 149.984       | 186.117       | 837.994        |
| 7       | C <sub>6</sub> H <sub>5</sub> CH <sub>2</sub>                       | 1.784<br>2 | 1.882<br>2 | 1874       | 116        | 12.169<br>0      | 10.118<br>8      | 10.051<br>5       | 6.5159            | 4.230<br>1             | 0.628<br>4 | 305.473       | 384.000       | 2587.450       |
| 8       | NO <sub>2</sub> -C <sub>6</sub> H <sub>4</sub> -<br>CH <sub>2</sub> | 1.793<br>2 | 1.925<br>2 | 3536       | 148        | 14.778<br>1      | 13.160<br>4      | 11.050<br>4       | 7.3918            | 4.838<br>7             | 0.620<br>2 | 419.119       | 536.955       | 4205.460       |
| 9       | fmoc <sup>b</sup>                                                   | 1.084      | 1.120      | 5786       | 212        | 19.135           | 16.887           | 15.303            | 11.043            | 8.491                  | 0.584      | 664.657       | 862.320       | 7872.150       |

|                                        | 4     | 2     |        |        | 4      | 1      | 6      | 5      | 9      | 6     |        |        |        |
|----------------------------------------|-------|-------|--------|--------|--------|--------|--------|--------|--------|-------|--------|--------|--------|
| <b>R(HT29)<sup>c</sup></b>             | 0.825 | 0.827 | -0.644 | -0.709 | -0.686 | -0.685 | -0.643 | -0.655 | -0.694 | 0.672 | -0.706 | -0.706 | -0.686 |
| <b>R<sup>2</sup>(HT29)<sup>c</sup></b> | 0.681 | 0.684 | 0.415  | 0.503  | 0.471  | 0.469  | 0.413  | 0.429  | 0.482  | 0.452 | 0.498  | 0.498  | 0.471  |

**Table 1:** Cont.

| Ref | Z                                                                   | E.DIST.m<br>ag | V.ADJ.e<br>qu | V.ADJ.m<br>ag | V.DIST.e<br>qu | V.DIST.m<br>ag | SC <sub>0</sub> | SC <sub>1</sub> | SC <sub>2</sub> | SC <sub>3P</sub> | Mol.SA<br>SA | Mol.SAV<br>ol | logS           |
|-----|---------------------------------------------------------------------|----------------|---------------|---------------|----------------|----------------|-----------------|-----------------|-----------------|------------------|--------------|---------------|----------------|
| 1   | CH <sub>3</sub> CH <sub>2</sub>                                     | 1427.410       | 121.951       | 134.606       | 720.053        | 1687.040       | 15              | 14              | 16              | 16               | 423.836      | 371.352       | -<br>1.28<br>6 |
| 2   | CH <sub>3</sub> (CH <sub>2</sub> ) <sub>2</sub>                     | 1961.230       | 145.108       | 160.000       | 987.060        | 2269.350       | 17              | 16              | 18              | 18               | 473.396      | 412.375       | -<br>1.81<br>6 |
| 3   | CH <sub>3</sub> (CH <sub>2</sub> ) <sub>3</sub>                     | 2590.090       | 168.990       | 186.117       | 1302.880       | 2947.980       | 19              | 18              | 20              | 20               | 525.362      | 455.386       | -<br>1.99<br>9 |
| 4   | CH <sub>3</sub> (CH <sub>2</sub> ) <sub>5</sub>                     | 4144.310       | 218.621       | 240.215       | 2084.680       | 4604.960       | 23              | 22              | 24              | 24               | 609.008      | 526.744       | -<br>4.58<br>3 |
| 5   | (CH <sub>3</sub> ) <sub>2</sub> CHC<br>H <sub>2</sub>               | 2592.080       | 168.990       | 186.117       | 1270.520       | 2951.250       | 19              | 18              | 22              | 20               | 505.977      | 438.461       | -<br>1.78<br>1 |
| 6   | CH <sub>2</sub> =CH-<br>CH <sub>2</sub>                             | 1961.230       | 145.108       | 160.000       | 987.060        | 2269.350       | 17              | 16              | 18              | 18               | 460.945      | 407.775       | -<br>1.33<br>8 |
| 7   | C <sub>6</sub> H <sub>5</sub> CH <sub>2</sub>                       | 6124.480       | 258.347       | 296.423       | 2413.220       | 5599.060       | 25              | 26              | 32              | 36               | 584.488      | 517.848       | -<br>3.72<br>0 |
| 8   | NO <sub>2</sub> -C <sub>6</sub> H <sub>4</sub> -<br>CH <sub>2</sub> | 9878.370       | 339.324       | 384.000       | 4007.580       | 9193.700       | 31              | 32              | 42              | 48               | 638.246      | 572.641       | -<br>4.78<br>5 |

|          |                                        |               |         |         |          |               |                |                |                |                |         |         |                |
|----------|----------------------------------------|---------------|---------|---------|----------|---------------|----------------|----------------|----------------|----------------|---------|---------|----------------|
| <b>9</b> | fmoc <sup>b</sup>                      | 20505.10<br>0 | 485.012 | 568.430 | 6255.730 | 15598.40<br>0 | 39             | 44             | 62             | 88             | 773.117 | 687.571 | -<br>8.33<br>2 |
|          | <b>R(HT29)<sup>c</sup></b>             | -0.691        | -0.693  | -0.706  | -0.656   | -0.668        | -<br>0.67<br>3 | -<br>0.70<br>7 | -<br>0.71<br>0 | -<br>0.71<br>8 | -0.637  | -0.651  | 0.64<br>7      |
|          | <b>R<sup>2</sup>(HT29)<sup>c</sup></b> | 0.477         | 0.480   | 0.498   | 0.430    | 0.446         | 0.45<br>3      | 0.50<br>0      | 0.50<br>4      | 0.51<br>6      | 0.406   | 0.424   | 0.41<br>9      |

<sup>a</sup> See text for details. <sup>b</sup> 9-fluorenylmethyl. <sup>c</sup>R, R<sup>2</sup>= Regression coefficients (cell line).

**Table 2:** 3D dreiding descriptors for aliphatic derivatives<sup>a</sup>



| Ref | Z                                                                   | JursPPS<br>A3 | JursWPS<br>A3 | Shad<br>YZ  |
|-----|---------------------------------------------------------------------|---------------|---------------|-------------|
| 1   | CH <sub>3</sub> CH <sub>2</sub>                                     | 18.1395       | 8.8539        | 38.26<br>84 |
| 2   | CH <sub>3</sub> (CH <sub>2</sub> ) <sub>2</sub>                     | 18.4464       | 10.0685       | 42.69<br>70 |
| 3   | CH <sub>3</sub> (CH <sub>2</sub> ) <sub>3</sub>                     | 24.8708       | 15.1755       | 46.86<br>45 |
| 4   | CH <sub>3</sub> (CH <sub>2</sub> ) <sub>5</sub>                     | 20.8778       | 15.5347       | 46.38<br>70 |
| 5   | (CH <sub>3</sub> ) <sub>2</sub> CHC<br>H <sub>2</sub>               | 23.3740       | 13.9356       | 46.22<br>55 |
| 6   | CH <sub>2</sub> =CH-<br>CH <sub>2</sub>                             | 25.6778       | 13.3979       | 40.64<br>97 |
| 7   | C <sub>6</sub> H <sub>5</sub> CH <sub>2</sub>                       | 30.8694       | 20.2047       | 51.91<br>43 |
| 8   | NO <sub>2</sub> -C <sub>6</sub> H <sub>4</sub> -<br>CH <sub>2</sub> | 32.1951       | 23.4517       | 58.80<br>28 |

|          |                                        |         |         |             |
|----------|----------------------------------------|---------|---------|-------------|
| <b>9</b> | fmoc <sup>b</sup>                      | 35.2453 | 29.5656 | 73.77<br>09 |
|          | <b>R(HT29)<sup>c</sup></b>             | -0.712  | -0.704  | -0.696      |
|          | <b>R<sup>2</sup>(HT29)<sup>c</sup></b> | 0.507   | 0.496   | 0.484       |

<sup>a</sup> See text for details. <sup>b</sup> 9-fluorenylmethyl. <sup>c</sup>R, R<sup>2</sup>= Regression coefficient (cell line).

**Table 3:** 2D dreiding descriptors for aromatic derivatives<sup>a</sup>



| Re f.                                  | Z                                               | JY         | Wien er | Zagre b | CHI <sub>0</sub> | CHI <sub>1</sub> | CHI <sub>3P</sub> | CHI <sub>V0</sub> | CHI <sub>V1</sub> | CHI <sub>V2</sub> | CHI <sub>V3</sub> <sub>P</sub> | BIC        | CIC        | IAC_To tal   | IC          | SIC         | E.ADJ.e qu |
|----------------------------------------|-------------------------------------------------|------------|---------|---------|------------------|------------------|-------------------|-------------------|-------------------|-------------------|--------------------------------|------------|------------|--------------|-------------|-------------|------------|
| <b>10</b>                              | C <sub>6</sub> H <sub>5</sub>                   | 2.031<br>3 | 1408    | 108     | 16.49<br>33      | 11.16<br>90      | 6.969<br>6        | 13.97<br>50       | 9.175<br>3        | 5.797<br>5        | 3.714<br>3                     | 0.642<br>4 | 1.283<br>0 | 65.4468<br>0 | 3.240<br>52 | 0.716<br>36 | 277.670    |
| <b>11</b>                              | CH <sub>3</sub> O-C <sub>6</sub> H <sub>4</sub> | 2.025<br>4 | 2280    | 128     | 19.64<br>81      | 13.03<br>27      | 8.607<br>5        | 16.63<br>68       | 10.22<br>14       | 6.522<br>5        | 4.346<br>7                     | 0.589<br>2 | 1.685<br>5 | 79.5063<br>0 | 3.069<br>34 | 0.645<br>51 | 346.976    |
| <b>12</b>                              | CH <sub>3</sub> -C <sub>6</sub> H <sub>4</sub>  | 2.035<br>5 | 1802    | 120     | 18.23<br>38      | 11.95<br>67      | 7.791<br>0        | 15.82<br>03       | 9.996<br>7        | 6.797<br>5        | 4.269<br>8                     | 0.618<br>7 | 1.470<br>2 | 73.2121<br>0 | 3.173<br>66 | 0.683<br>41 | 318.307    |
| <b>13</b>                              | Cl-C <sub>6</sub> H <sub>4</sub>                | 2.034<br>7 | 1802    | 120     | 18.23<br>38      | 11.95<br>67      | 7.791<br>0        | 16.08<br>81       | 10.13<br>06       | 6.952<br>1        | 4.359<br>1                     | 0.618<br>7 | 1.470<br>2 | 73.7302<br>0 | 3.173<br>66 | 0.683<br>41 | 318.307    |
| <b>14</b>                              | F-C <sub>6</sub> H <sub>4</sub>                 | 2.042<br>4 | 1802    | 120     | 18.23<br>38      | 11.95<br>67      | 7.791<br>0        | 14.57<br>63       | 9.374<br>6        | 6.079<br>3        | 3.855<br>1                     | 0.618<br>7 | 1.470<br>2 | 73.7302<br>0 | 3.173<br>66 | 0.683<br>41 | 318.307    |
| <b>R(HT29)<sup>b</sup></b>             |                                                 | -<br>0.635 | 0.749   | 0.709   | 0.726            | 0.753            | 0.740             | 0.889             | 0.874             | 0.676             | 0.845                          | -<br>0.750 | 0.747      | 0.694        | -0.755      | -0.747      | 0.715      |
| <b>R<sup>2</sup>(HT29)<sup>b</sup></b> |                                                 | 0.403      | 0.561   | 0.503   | 0.527            | 0.567            | 0.548             | 0.790             | 0.764             | 0.457             | 0.714                          | 0.563      | 0.558      | 0.482        | 0.570       | 0.558       | 0.511      |

**Table 3: Cont.**

| Ref       | Z                                                   | E.ADJ.m<br>ag | E.DIST.e<br>qu | E.DIST.m<br>ag | V.ADJ.e<br>qu | V.ADJ.m<br>ag | V.DIST.e<br>qu | V.DIST.m<br>ag | Kappa<br>1  | Kappa1A<br>M | Kappa<br>2  | Kappa2A<br>M | Kappa<br>3 |
|-----------|-----------------------------------------------------|---------------|----------------|----------------|---------------|---------------|----------------|----------------|-------------|--------------|-------------|--------------|------------|
| <b>10</b> | C <sub>6</sub> H <sub>5</sub>                       | 354.413       | 2092.780       | 5091.700       | 232.192       | 268.078       | 1945.750       | 4617.410       | 19.326<br>4 | 16.6963      | 10.780<br>0 | 8.6952       | 7.6125     |
| <b>11</b> | CH <sub>3</sub> O-<br>C <sub>6</sub> H <sub>4</sub> | 444.235       | 3032.600       | 7270.180       | 284.941       | 325.212       | 2872.190       | 6691.230       | 23.280<br>6 | 20.5606      | 12.538<br>6 | 10.4112      | 8.4898     |
| <b>12</b> | CH <sub>3</sub> -C <sub>6</sub> H <sub>4</sub>      | 413.947       | 2533.330       | 6127.270       | 258.347       | 296.423       | 2381.310       | 5601.520       | 21.301<br>8 | 18.6656      | 10.982<br>7 | 8.9814       | 8.0443     |
| <b>13</b> | Cl-C <sub>6</sub> H <sub>4</sub>                    | 413.947       | 2533.330       | 6127.270       | 258.347       | 296.423       | 2381.310       | 5601.520       | 21.301<br>8 | 19.2376      | 10.982<br>7 | 9.4080       | 8.0443     |
| <b>14</b> | F-C <sub>6</sub> H <sub>4</sub>                     | 413.947       | 2533.330       | 6127.270       | 258.347       | 296.423       | 2381.310       | 5601.520       | 21.301<br>8 | 18.5275      | 10.982<br>7 | 8.8792       | 8.0443     |
|           | <b>R(HT29)</b>                                      | 0.682         | 0.747          | 0.746          | 0.742         | 0.741         | 0.747          | 0.746          | 0.741       | 0.744        | 0.711       | 0.753        | 0.742      |
|           | <b>R<sup>2</sup>(HT29)<br/>b</b>                    | 0.465         | 0.558          | 0.557          | 0.551         | 0.549         | 0.558          | 0.557          | 0.549       | 0.554        | 0.506       | 0.567        | 0.551      |

**Table 3: Cont.**

| Re f. | Z                                               | Kappa3 AM | PHI     | SC0   | SC1   | SC2   | SC3 P | Mol.Surf.Area | Mol.PolarSurf. Area | Mol.SA SA | Mol.PolarSA SA | Mol.Fract.PolarS ASA | Mol.SAV ol |
|-------|-------------------------------------------------|-----------|---------|-------|-------|-------|-------|---------------|---------------------|-----------|----------------|----------------------|------------|
| 10    | C <sub>6</sub> H <sub>5</sub>                   | 5.9144    | 6.31202 | 23    | 24    | 30    | 34    | 314.390       | 86.540              | 534.928   | 149.145        | 0.278                | 476.825    |
| 11    | CH <sub>3</sub> O-C <sub>6</sub> H <sub>4</sub> | 6.8149    | 7.92813 | 27    | 28    | 36    | 42    | 379.480       | 105.010             | 607.300   | 161.206        | 0.265                | 538.461    |
| 12    | CH <sub>3</sub> -C <sub>6</sub> H <sub>4</sub>  | 6.3851    | 6.70572 | 25    | 26    | 34    | 38    | 353.220       | 86.540              | 573.919   | 149.145        | 0.259                | 508.650    |
| 13    | Cl-C <sub>6</sub> H <sub>4</sub>                | 6.7353    | 7.23948 | 25    | 26    | 34    | 38    | 360.530       | 86.540              | 577.738   | 149.145        | 0.258                | 534.514    |
| 14    | F-C <sub>6</sub> H <sub>4</sub>                 | 6.3015    | 6.58037 | 25    | 26    | 34    | 38    | 331.280       | 86.540              | 553.127   | 149.145        | 0.269                | 495.259    |
|       | <b>R(HT29)<sup>b</sup></b>                      | 0.695     | 0.754   | 0.741 | 0.741 | 0.680 | 0.741 | 0.876         | 0.675               | 0.887     | 0.675          | -0.617               | 0.739      |
|       | <b>R<sup>2</sup>(HT29)<sup>b</sup></b>          | 0.483     | 0.569   | 0.549 | 0.549 | 0.462 | 0.549 | 0.767         | 0.456               | 0.787     | 0.456          | 0.381                | 0.546      |

<sup>a</sup> See text for details. <sup>b</sup> R, R<sup>2</sup>= Regression coefficient (cell line).

**Table 4:** 3D dreiding descriptors, aromatic derivatives<sup>a</sup>



| Re f.                                  | Z                                               | Mol.V ol.   | Dipole_m ag | JursDPS A1    | JursDPS A2     | JursFNS A3 | JursFPS A2 | JursPPS A1    | JursPPS A2     | JursSA SA     | JursTA SA     | JursWPS A1 |
|----------------------------------------|-------------------------------------------------|-------------|-------------|---------------|----------------|------------|------------|---------------|----------------|---------------|---------------|------------|
| 10                                     | C <sub>6</sub> H <sub>5</sub>                   | 196.47<br>0 | 9.74788     | 154.2586<br>7 | 1458.981<br>48 | -0.08305   | 1.48873    | 372.6692<br>6 | 880.0593<br>0  | 591.079<br>59 | 492.244<br>52 | 220.33285  |
| 11                                     | CH <sub>3</sub> O-C <sub>6</sub> H <sub>4</sub> | 237.34<br>2 | 9.45944     | 269.5102<br>3 | 2004.101<br>28 | -0.07959   | 1.94709    | 481.2221<br>8 | 1349.282<br>05 | 692.934<br>13 | 565.701<br>82 | 333.50444  |
| 12                                     | CH <sub>3</sub> -C <sub>6</sub> H <sub>4</sub>  | 223.09<br>6 | 9.67384     | 234.1905<br>2 | 1629.388<br>52 | -0.07381   | 1.63485    | 443.1581<br>9 | 1066.210<br>37 | 652.126<br>11 | 552.834<br>70 | 289.04881  |
| 13                                     | Cl-C <sub>6</sub> H <sub>4</sub>                | 228.72<br>4 | 10.18916    | -4.47812      | 1578.472<br>96 | -0.09019   | 1.15426    | 317.1898<br>1 | 737.5314<br>4  | 638.857<br>56 | 539.948<br>85 | 202.70159  |
| 14                                     | F-C <sub>6</sub> H <sub>4</sub>                 | 206.06<br>1 | 10.43779    | 50.96737      | 1601.578<br>15 | -0.10517   | 1.35221    | 330.1424<br>4 | 824.0400<br>0  | 609.317<br>41 | 419.118<br>41 | 201.21967  |
| <b>R(HT29)<sub>b</sub></b>             |                                                 | 0.876       | -0.725      | 0.684         | 0.772          | 0.732      | 0.694      | 0.823         | 0.802          | 0.947         | 0.885         | 0.897      |
| <b>R<sup>2</sup>(HT29)<sub>b</sub></b> |                                                 | 0.767       | 0.526       | 0.468         | 0.596          | 0.536      | 0.482      | 0.677         | 0.643          | 0.897         | 0.783         | 0.805      |

Table 4: Cont.

| Ref | Z                                                   | JursWPS<br>A2 | JursWPS<br>A3 | Shad.n<br>u | Shad.Xlen<br>g. | Shad.XY       | Shad.XYfr<br>ac | Shad.X<br>Z  | Shad.XZfr<br>ac |
|-----|-----------------------------------------------------|---------------|---------------|-------------|-----------------|---------------|-----------------|--------------|-----------------|
| 10  | C <sub>6</sub> H <sub>5</sub>                       | 520.31641     | 17.18127      | 3.2101<br>6 | 17.65453        | 103.590<br>11 | 0.53580         | 59.0495<br>9 | 0.60766         |
| 11  | CH <sub>3</sub> O-<br>C <sub>6</sub> H <sub>4</sub> | 935.10167     | 23.95072      | 3.8284<br>0 | 21.42878        | 121.546<br>72 | 0.49384         | 73.5530<br>8 | 0.61370         |
| 12  | CH <sub>3</sub> -C <sub>6</sub> H <sub>4</sub>      | 695.43278     | 18.62704      | 3.5359<br>9 | 19.48750        | 113.890<br>56 | 0.52180         | 68.1731<br>0 | 0.63396         |
| 13  | Cl-C <sub>6</sub> H <sub>4</sub>                    | 471.32304     | 16.27966      | 3.5563<br>3 | 19.56504        | 113.012<br>52 | 0.51473         | 66.4236<br>9 | 0.61650         |
| 14  | F-C <sub>6</sub> H <sub>4</sub>                     | 502.24711     | 16.87461      | 3.3609<br>2 | 18.48275        | 107.335<br>85 | 0.52434         | 61.7191<br>8 | 0.60663         |
|     | <b>R(HT29)<sup>b</sup></b>                          | 0.851         | 0.776         | 0.891       | 0.889           | 0.925         | -0.781          | 0.950        | 0.652           |
|     | <b>R<sup>2</sup>(HT29)<sub>b</sub></b>              | 0.724         | 0.602         | 0.794       | 0.790           | 0.856         | 0.610           | 0.903        | 0.425           |

**Table 4:** Cont.

| <b>Ref.</b> | <b>Z</b>                                        | <b>Shad.Yleng.</b> | <b>Shad.YZ</b> | <b>Shad.YZfrac</b> | <b>Shad.Zleng.</b> |
|-------------|-------------------------------------------------|--------------------|----------------|--------------------|--------------------|
| <b>10</b>   | C <sub>6</sub> H <sub>5</sub>                   | 11.05162           | 37.61844       | 0.61666            | 5.52002            |
| <b>11</b>   | CH <sub>3</sub> O-C <sub>6</sub> H <sub>4</sub> | 11.67455           | 42.27212       | 0.64673            | 5.60130            |
| <b>12</b>   | CH <sub>3</sub> -C <sub>6</sub> H <sub>4</sub>  | 11.34460           | 40.75131       | 0.64858            | 5.53139            |
| <b>13</b>   | Cl-C <sub>6</sub> H <sub>4</sub>                | 11.37357           | 39.10453       | 0.62159            | 5.52440            |
| <b>14</b>   | F-C <sub>6</sub> H <sub>4</sub>                 | 11.19467           | 38.13779       | 0.61687            | 5.52100            |
|             | <b>R(HT29)<sup>b</sup></b>                      | 0.877              | 0.972          | 0.944              | 0.762              |
|             | <b>R<sup>2</sup>(HT29)<sup>b</sup></b>          | 0.769              | 0.945          | 0.891              | 0.581              |

<sup>a</sup> See text for details. <sup>b</sup> R, R<sup>2</sup>= Regression coefficient (cell line).

## QuaSAR\_Contingency Analysis

Database : contingencia\_alifaticos  
Date : Thu May 04 09:30:15 2017  
Activity Field : HT29  
Sample Size : 9

C : Contingency Coefficient (above 0.6 is useful)  
V : Cramer's V (above 0.2 is useful)  
U : Entropic Uncertainty (above 0.2 is useful)  
R : Linear Correlation R\*\*2 (above 0.2 is useful)

### Database fields

| #  | C       | V       | U       | R       | Field                                |
|----|---------|---------|---------|---------|--------------------------------------|
| 1  | 0.82717 | 0.42492 | 0.65122 | 0.32896 | ALogP                                |
| 2  | 0.78551 | 0.36641 | 0.55726 | 0.45990 | Molecular_Solubility                 |
| 3  | 0.82717 | 0.42492 | 0.68353 | 0.38123 | Molecular_Volume                     |
| 4  | 0.84908 | 0.46398 | 0.74577 | 0.32160 | Molecular_SurfaceArea                |
| 5  | 0.44721 | 0.14434 | 0.15912 | 0.00985 | Molecular_PolarSurfaceArea           |
| 6  | 0.79057 | 0.37268 | 0.58428 | 0.26570 | Molecular_FractionalPolarSurfaceArea |
| 7  | 0.82717 | 0.42492 | 0.65122 | 0.38197 | Molecular_SASA                       |
| 8  | 0.44721 | 0.14434 | 0.15912 | 0.00712 | Molecular_PolarSASA                  |
| 9  | 0.81264 | 0.40254 | 0.65840 | 0.14085 | Molecular_FractionalPolarSASA        |
| 10 | 0.82717 | 0.42492 | 0.65122 | 0.40699 | Molecular_SAVol                      |
| 11 | 0.84908 | 0.46398 | 0.71210 | 0.45161 | BIC                                  |
| 12 | 0.82717 | 0.42492 | 0.65122 | 0.38650 | CIC                                  |
| 13 | 0.77021 | 0.34861 | 0.53848 | 0.49780 | E_ADJ_equ                            |
| 14 | 0.77021 | 0.34861 | 0.53848 | 0.49810 | E_ADJ_mag                            |
| 15 | 0.78446 | 0.36515 | 0.58597 | 0.47092 | E_DIST_equ                           |
| 16 | 0.78446 | 0.36515 | 0.58597 | 0.47707 | E_DIST_mag                           |
| 17 | 0.82199 | 0.41667 | 0.68353 | 0.14434 | IAC_Mean                             |
| 18 | 0.84908 | 0.46398 | 0.74577 | 0.25831 | IAC_Total                            |
| 19 | 0.84242 | 0.45134 | 0.72298 | 0.01946 | IC                                   |
| 20 | 0.82199 | 0.41667 | 0.65122 | 0.32530 | SIC                                  |
| 21 | 0.81837 | 0.41107 | 0.65840 | 0.47996 | V_ADJ_equ                            |
| 22 | 0.81837 | 0.41107 | 0.65840 | 0.49817 | V_ADJ_mag                            |
| 23 | 0.82717 | 0.42492 | 0.71922 | 0.43061 | V_DIST_equ                           |
| 24 | 0.72375 | 0.30277 | 0.49947 | 0.44576 | V_DIST_mag                           |
| 25 | 0.84242 | 0.45134 | 0.72298 | 0.39591 | CHI_0                                |
| 26 | 0.81837 | 0.41107 | 0.65840 | 0.47109 | CHI_1                                |
| 27 | 0.81837 | 0.41107 | 0.65840 | 0.46866 | CHI_2                                |
| 28 | 0.77799 | 0.35746 | 0.58597 | 0.22564 | CHI_3_C                              |
| 29 | 0.00000 | 0.00000 | 0.00000 | 0.00000 | CHI_3_CH                             |
| 30 | 0.78446 | 0.36515 | 0.58597 | 0.51615 | CHI_3_P                              |
| 31 | 0.84908 | 0.46398 | 0.74577 | 0.40048 | CHI_V_0                              |
| 32 | 0.82717 | 0.42492 | 0.68353 | 0.41015 | CHI_V_1                              |
| 33 | 0.82717 | 0.42492 | 0.68353 | 0.42416 | CHI_V_2                              |
| 34 | 0.77799 | 0.35746 | 0.58597 | 0.22195 | CHI_V_3_C                            |
| 35 | 0.00000 | 0.00000 | 0.00000 | 0.00000 | CHI_V_3_CH                           |
| 36 | 0.79057 | 0.37268 | 0.64866 | 0.47312 | CHI_V_3_P                            |

37 0.72633 0.30505 0.49947 0.69116 JX  
38 0.73620 0.31402 0.49947 0.69521 JY  
39 0.72375 0.30277 0.49947 0.41495 Wiener  
40 0.81837 0.41107 0.65840 0.50321 Zagreb  
41 0.82717 0.42492 0.65122 0.27665 Kappa\_1  
42 0.82717 0.42492 0.65122 0.20109 Kappa\_1\_AM  
43 0.82199 0.41667 0.65122 0.00975 Kappa\_2  
44 0.81837 0.41107 0.65840 0.01404 Kappa\_2\_AM  
45 0.82717 0.42492 0.65122 0.31446 Kappa\_3  
46 0.79057 0.37268 0.58428 0.35411 Kappa\_3\_AM  
47 0.81064 0.39965 0.69347 0.26174 PHI  
48 0.82717 0.28868 0.65122 0.45328 SC\_0  
49 0.82717 0.26021 0.65122 0.50021 SC\_1  
50 0.84908 0.23199 0.71210 0.50348 SC\_2  
51 0.72633 0.30505 0.49947 0.39142 SC\_3\_C  
52 0.00000 0.00000 0.00000 0.00000 SC\_3\_CH  
53 0.82717 0.17111 0.65122 0.51533 SC\_3\_P  
54 0.75593 0.33333 0.47067 0.06108 Dipole\_mag  
55 0.71660 0.29659 0.40688 0.01803 Dipole\_X  
56 0.76089 0.33850 0.53848 0.00574 Dipole\_Y  
57 0.79301 0.37577 0.55726 0.45953 Dipole\_Z  
58 0.81064 0.39965 0.65840 0.07256 Jurs\_DPSA\_1  
59 0.79301 0.37577 0.55726 0.18399 Jurs\_DPSA\_2  
60 0.72375 0.30277 0.49947 0.02015 Jurs\_DPSA\_3  
61 0.84242 0.45134 0.72298 0.20209 Jurs\_FNSA\_1  
62 0.79301 0.37577 0.55726 0.10106 Jurs\_FNSA\_2  
63 0.77021 0.34861 0.53848 0.01706 Jurs\_FNSA\_3  
64 0.84908 0.46398 0.71210 0.20208 Jurs\_FPSA\_1  
65 0.82199 0.41667 0.68353 0.04098 Jurs\_FPSA\_2  
66 0.84908 0.46398 0.71210 0.19344 Jurs\_FPSA\_3  
67 0.78446 0.36515 0.58597 0.30621 Jurs\_PNSA\_1  
68 0.82717 0.42492 0.71922 0.14862 Jurs\_PNSA\_2  
69 0.70211 0.28464 0.40688 0.00015 Jurs\_PNSA\_3  
70 0.84242 0.45134 0.72298 0.02880 Jurs\_PPSA\_1  
71 0.79057 0.37268 0.58428 0.16094 Jurs\_PPSA\_2  
72 0.82199 0.41667 0.65122 0.46211 Jurs\_PPSA\_3  
73 0.77021 0.34861 0.53848 0.11353 Jurs\_RASA  
74 0.82199 0.41667 0.65122 0.22245 Jurs\_RNCG  
75 0.77460 0.35355 0.58694 0.07523 Jurs\_RNCS  
76 0.79301 0.37577 0.55726 0.21011 Jurs\_RPCG  
77 0.78551 0.36641 0.55726 0.10065 Jurs\_RPCS  
78 0.77021 0.34861 0.53848 0.11353 Jurs\_RPSA  
79 0.84908 0.46398 0.74577 0.30392 Jurs\_SASA  
80 0.82717 0.42492 0.65122 0.39306 Jurs\_TASA  
81 0.63246 0.23570 0.30939 0.02682 Jurs\_TPSA  
82 0.76564 0.34359 0.53848 0.34637 Jurs\_WNSA\_1  
83 0.81064 0.39965 0.61479 0.18692 Jurs\_WNSA\_2  
84 0.78446 0.36515 0.58597 0.00541 Jurs\_WNSA\_3  
85 0.84242 0.45134 0.75954 0.15508 Jurs\_WPSA\_1  
86 0.81837 0.41107 0.65840 0.21910 Jurs\_WPSA\_2  
87 0.79057 0.37268 0.58428 0.43413 Jurs\_WPSA\_3  
88 0.81837 0.41107 0.65840 0.23711 PMI\_mag

89 0.84242 0.45134 0.75954 0.33521 PMI\_X  
90 0.81837 0.41107 0.65840 0.24028 PMI\_Y  
91 0.84242 0.45134 0.72298 0.22916 PMI\_Z  
92 0.73620 0.31402 0.49947 0.13168 Shadow\_nu  
93 0.70413 0.28626 0.37712 0.04322 Shadow\_Xlength  
94 0.84908 0.46398 0.74577 0.28747 Shadow\_XY  
95 0.78551 0.36641 0.58694 0.17722 Shadow\_XYfrac  
96 0.82717 0.42492 0.65122 0.36213 Shadow\_XZ  
97 0.79057 0.37268 0.58428 0.28057 Shadow\_XZfrac  
98 0.86603 0.50000 0.80239 0.23686 Shadow\_Ylength  
99 0.82717 0.42492 0.68353 0.50423 Shadow\_YZ  
100 0.82375 0.41944 0.62671 0.15175 Shadow\_YZfrac  
101 0.79057 0.37268 0.58428 0.52557 Shadow\_Zlength

## QuaSAR\_Contingency Analysis

Database : contingencia\_aromaticos

Date : Thu May 04 09:48:40 2017

Activity Field : HT29

Sample Size : 5

C : Contingency Coefficient (above 0.6 is useful)

V : Cramer's V (above 0.2 is useful)

U : Entropic Uncertainty (above 0.2 is useful)

R : Linear Correlation R\*\*2 (above 0.2 is useful)

### Database fields

| #  | C       | V       | U       | R       | Field                                |
|----|---------|---------|---------|---------|--------------------------------------|
| 1  | 0.83205 | 0.43301 | 0.79188 | 0.00900 | ALogP                                |
| 2  | 0.86603 | 0.50000 | 0.90575 | 0.01557 | Molecular_Solubility                 |
| 3  | 0.86603 | 0.50000 | 0.90575 | 0.78323 | Molecular_Volume                     |
| 4  | 0.86603 | 0.50000 | 0.90575 | 0.76806 | Molecular_SurfaceArea                |
| 5  | 0.70711 | 0.28868 | 0.54612 | 0.45614 | Molecular_PolarSurfaceArea           |
| 6  | 0.86603 | 0.50000 | 0.90575 | 0.00007 | Molecular_FractionalPolarSurfaceArea |
| 7  | 0.81650 | 0.40825 | 0.79188 | 0.78622 | Molecular_SASA                       |
| 8  | 0.70711 | 0.28868 | 0.54612 | 0.45614 | Molecular_PolarSASA                  |
| 9  | 0.86603 | 0.50000 | 0.90575 | 0.11375 | Molecular_FractionalPolarSASA        |
| 10 | 0.86603 | 0.50000 | 0.90575 | 0.54612 | Molecular_SAVol                      |
| 11 | 0.70711 | 0.28868 | 0.54612 | 0.45614 | BIC                                  |
| 12 | 0.75593 | 0.33333 | 0.58973 | 0.52930 | CIC                                  |
| 13 | 0.75593 | 0.33333 | 0.58973 | 0.51062 | E_ADJ_equ                            |
| 14 | 0.75593 | 0.33333 | 0.58973 | 0.46538 | E_ADJ_mag                            |
| 15 | 0.75593 | 0.33333 | 0.58973 | 0.55772 | E_DIST_equ                           |
| 16 | 0.75593 | 0.33333 | 0.58973 | 0.55598 | E_DIST_mag                           |
| 17 | 0.77460 | 0.35355 | 0.65155 | 0.30370 | IAC_Mean                             |
| 18 | 0.75593 | 0.33333 | 0.58973 | 0.48191 | IAC_Total                            |
| 19 | 0.75593 | 0.33333 | 0.58973 | 0.32068 | IC                                   |
| 20 | 0.75593 | 0.33333 | 0.58973 | 0.49890 | SIC                                  |
| 21 | 0.75593 | 0.33333 | 0.58973 | 0.54984 | V_ADJ_equ                            |
| 22 | 0.75593 | 0.33333 | 0.58973 | 0.54975 | V_ADJ_mag                            |
| 23 | 0.75593 | 0.33333 | 0.58973 | 0.55737 | V_DIST_equ                           |
| 24 | 0.75593 | 0.33333 | 0.58973 | 0.55620 | V_DIST_mag                           |
| 25 | 0.75593 | 0.33333 | 0.58973 | 0.52779 | CHI_0                                |
| 26 | 0.75593 | 0.33333 | 0.58973 | 0.56668 | CHI_1                                |
| 27 | 0.75593 | 0.33333 | 0.58973 | 0.38131 | CHI_2                                |
| 28 | 0.75593 | 0.33333 | 0.58973 | 0.09440 | CHI_3_C                              |
| 29 | 0.00000 | 0.00000 | 0.00000 | 0.00000 | CHI_3_CH                             |
| 30 | 0.75593 | 0.33333 | 0.58973 | 0.54795 | CHI_3_P                              |
| 31 | 0.86603 | 0.50000 | 0.90575 | 0.79047 | CHI_V_0                              |
| 32 | 0.86603 | 0.50000 | 0.90575 | 0.76446 | CHI_V_1                              |
| 33 | 0.86603 | 0.50000 | 0.90575 | 0.45661 | CHI_V_2                              |
| 34 | 0.83205 | 0.43301 | 0.79188 | 0.19162 | CHI_V_3_C                            |
| 35 | 0.00000 | 0.00000 | 0.00000 | 0.00000 | CHI_V_3_CH                           |
| 36 | 0.86603 | 0.50000 | 0.90575 | 0.71452 | CHI_V_3_P                            |

37 0.83205 0.43301 0.79188 0.00213 JX  
38 0.81650 0.40825 0.79188 0.03494 JY  
39 0.75593 0.33333 0.58973 0.56167 Wiener  
40 0.75593 0.24618 0.58973 0.50321 Zagreb  
41 0.75593 0.33333 0.58973 0.54860 Kappa\_1  
42 0.86603 0.50000 0.90575 0.55382 Kappa\_1\_AM  
43 0.75593 0.33333 0.58973 0.50597 Kappa\_2  
44 0.83205 0.43301 0.79188 0.56772 Kappa\_2\_AM  
45 0.75593 0.33333 0.58973 0.55101 Kappa\_3  
46 0.86603 0.50000 0.90575 0.48478 Kappa\_3\_AM  
47 0.86603 0.50000 0.90575 0.56915 PHI  
48 0.75593 0.33333 0.58973 0.54846 SC\_0  
49 0.75593 0.33333 0.58973 0.54846 SC\_1  
50 0.75593 0.33333 0.58973 0.46289 SC\_2  
51 0.52223 0.17678 0.24353 0.24560 SC\_3\_C  
52 0.00000 0.00000 0.00000 0.00000 SC\_3\_CH  
53 0.75593 0.33333 0.58973 0.54846 SC\_3\_P  
54 0.83205 0.43301 0.79188 0.00365 Dipole\_mag  
55 0.86603 0.50000 0.90575 0.58699 Dipole\_X  
56 0.86603 0.50000 0.90575 0.58251 Dipole\_Y  
57 0.86603 0.50000 0.90575 0.66395 Dipole\_Z  
58 0.86603 0.50000 0.90575 0.46543 Jurs\_DPSA\_1  
59 0.83205 0.43301 0.79188 0.58574 Jurs\_DPSA\_2  
60 0.86603 0.50000 0.90575 0.00373 Jurs\_DPSA\_3  
61 0.81650 0.40825 0.79188 0.38330 Jurs\_FNSA\_1  
62 0.77460 0.35355 0.65155 0.26875 Jurs\_FNSA\_2  
63 0.86603 0.50000 0.90575 0.32175 Jurs\_FNSA\_3  
64 0.86603 0.50000 0.90575 0.38330 Jurs\_FPSA\_1  
65 0.86603 0.50000 0.90575 0.47944 Jurs\_FPSA\_2  
66 0.86603 0.50000 0.90575 0.00526 Jurs\_FPSA\_3  
67 0.75593 0.33333 0.58973 0.17263 Jurs\_PNSA\_1  
68 0.86603 0.50000 0.90575 0.05428 Jurs\_PNSA\_2  
69 0.86603 0.50000 0.90575 0.12166 Jurs\_PNSA\_3  
70 0.83205 0.43301 0.79188 0.68231 Jurs\_PPSA\_1  
71 0.86603 0.50000 0.90575 0.63597 Jurs\_PPSA\_2  
72 0.86603 0.50000 0.90575 0.33287 Jurs\_PPSA\_3  
73 0.83205 0.43301 0.79188 0.26185 Jurs\_RASA  
74 0.86603 0.50000 0.90575 0.48129 Jurs\_RNCG  
75 0.70711 0.28868 0.54612 0.47813 Jurs\_RNCS  
76 0.86603 0.50000 0.90575 0.28431 Jurs\_RPCG  
77 0.83205 0.43301 0.79188 0.24377 Jurs\_RPCS  
78 0.75593 0.33333 0.58973 0.26185 Jurs\_RPSA  
79 0.86603 0.50000 0.90575 0.89808 Jurs\_SASA  
80 0.86603 0.50000 0.90575 0.77598 Jurs\_TASA  
81 0.75593 0.33333 0.58973 0.14787 Jurs\_TPSA  
82 0.83205 0.43301 0.79188 0.02662 Jurs\_WNSA\_1  
83 0.86603 0.50000 0.90575 0.00547 Jurs\_WNSA\_2  
84 0.86603 0.50000 0.90575 0.00783 Jurs\_WNSA\_3  
85 0.83205 0.43301 0.79188 0.81517 Jurs\_WPSA\_1  
86 0.81650 0.40825 0.83268 0.71672 Jurs\_WPSA\_2  
87 0.83205 0.43301 0.79188 0.59550 Jurs\_WPSA\_3  
88 0.83205 0.43301 0.79188 0.27167 PMI\_mag

89 0.86603 0.50000 0.90575 0.40758 PMI\_X  
90 0.86603 0.50000 0.90575 0.25982 PMI\_Y  
91 0.83205 0.43301 0.79188 0.27641 PMI\_Z  
92 0.86603 0.50000 0.90575 0.83464 Shadow\_nu  
93 0.86603 0.50000 0.90575 0.83781 Shadow\_Xlength  
94 0.81650 0.40825 0.79188 0.85166 Shadow\_XY  
95 0.81650 0.40825 0.79188 0.69125 Shadow\_XYfrac  
96 0.86603 0.50000 0.90575 0.90875 Shadow\_XZ  
97 0.81650 0.40825 0.88385 0.65466 Shadow\_XZfrac  
98 0.70711 0.28868 0.54612 0.46638 Shadow\_Ylength  
99 0.81650 0.40825 0.83268 0.80256 Shadow\_YZ  
100 0.81650 0.40825 0.83268 0.88420 Shadow\_YZfrac  
101 0.83205 0.43301 0.79188 0.01636 Shadow\_Zlength

**Table 5:** Energy (Kcal/mol) data of the theoretical chemical species formed after the proposed nucleophilic attack<sup>a</sup>



| ref | Z                             | C <sub>2</sub> | C <sub>4</sub> |
|-----|-------------------------------|----------------|----------------|
| 1   | CH <sub>3</sub> C             | -              | -              |
|     | H <sub>2</sub>                | 3159.14        | 3159.12        |
| 10  | C <sub>6</sub> H <sub>5</sub> | 82             | 90             |
|     |                               | -              | -              |
|     |                               | 3458.31        | 3458.34        |
|     |                               | 97             | 68             |

<sup>a</sup>. Equilibrium geometry, STO-3G, water solvent continuum model.



**Figure 1:** Chromatographic analysis of compounds (a) **4** and (b) **14** taken as representatives of aliphatic and aromatic derivatives respectively.
